# Supplementary material for: Predictive value of C-reactive protein for radiographic spinal progression in axial spondyloarthritis in dependence on genetic determinants of fibrin clot formation and fibrinolysis
Source: HighWire-hosted journal article supplement (doi:10.1136/rmdopen-2021-001751), 2021-06-01
Supplement: rmdopen-2021-001751supp001_data_supplement.pdf [file rmdopen-2021-001751supp001_data_supplement.pdf]

**Supplementary table S1.** Genotype distributions in terms of minor allele carriage of included patients with axial spondyloarthritis.

| <b>Genotype</b>                | <b>All patients</b> | <b>r-axSpA</b> | <b>nr-axSpA</b> |
|--------------------------------|---------------------|----------------|-----------------|
| (minor allele carrier status)  | n (%)               | n (%)          | n (%)           |
| FGA Thr312Ala (rs6050 A>G)     | 94 (45)             | 47 (41)        | 47 (50)         |
| FGA rs2070006 G>A              | 144 (69)            | 80 (70)        | 64 (68)         |
| FGA rs2070016 T>C              | 60 (29)             | 27 (23)        | 33 (35)         |
| FGB rs1800788 C>T              | 73 (35)             | 34 (30)        | 39 (41)         |
| FGB rs1800790 G>A              | 84 (40)             | 39 (34)        | 45 (48)         |
| FGG rs1049636 T>C              | 86 (41)             | 56 (49)        | 30 (32)         |
| F13A Val34Leu (rs5985 G>T)     | 91 (44)             | 51 (44)        | 40 (43)         |
| F13A Tyr204Phe (rs3024477 A>T) | 8 (3.8)             | 3 (2.6)        | 5 (5.3)         |
| F13B His95Arg (rs6003 A>G)     | 67 (32)             | 39 (34)        | 28 (30)         |
| A2AP Arg6Trp (rs2070863 C>T)   | 93 (45)             | 56 (49)        | 37 (39)         |

Data are presented for all patients as well as differentiated for nr-axSpA and r-axSpA.

A2AP,  $\alpha_2$ -antiplasmin; FGA,  $\alpha$ -fibrinogen; FGB,  $\beta$ -fibrinogen; FGG,  $\gamma$ -fibrinogen; F13A, factor XIII A-subunit; F13B, factor XIII B-subunit; nr-axSpA, non-radiographic axial spondyloarthritis at baseline; r-axSpA, radiographic axial spondyloarthritis at baseline.
