# Supplementary material for: Predictive value of C-reactive protein for radiographic spinal progression in axial spondyloarthritis in dependence on genetic determinants of fibrin clot formation and fibrinolysis
Source: HighWire-hosted journal article supplement (doi:10.1136/rmdopen-2021-001751), 2021-06-01
Supplement: rmdopen-2021-001751supp002_data_supplement.pdf [file rmdopen-2021-001751supp002_data_supplement.pdf]

**Supplementary table S2.** Analysis of parameters associated with radiographic spinal progression (mSASSS change after 2 years) in axial spondyloarthritis.

|                            | Regression coefficient (95% CI) |                    |                                |
|----------------------------|---------------------------------|--------------------|--------------------------------|
|                            | Syndesmophytes                  | Smoking            | CRP <sub>mean</sub> ≥10 mg/L   |
| Total                      | 1.54 (0.79-2.28)                | 0.54 (-0.12-1.20)  | 0.88 (0.17-1.60)               |
| <b>FGB rs1800790G&gt;A</b> |                                 |                    |                                |
| Wild-type                  | 1.52 (0.36-2.67)                | 0.56 (-0.42-1.55)  | 1.41 (0.33-2.49)*              |
| Minor allele               | 1.42 (0.52-2.33)                | 0.54 (-0.27-1.36)  | 0.13 (-0.76-1.02)*             |
| <b>F13A Val34Leu</b>       |                                 |                    |                                |
| Wild-type                  | 2.45 (1.26-3.65)                | 0.32 (-0.64-1.29)  | 0.71 (-0.37-1.79) <sup>§</sup> |
| Minor allele               | 0.62 (-0.21-1.44)               | 0.51 (-0.35-1.37)  | 0.68 (-0.21-1.56) <sup>§</sup> |
| <b>F13B His95Arg</b>       |                                 |                    |                                |
| Wild-type                  | 2.12 (1.05-3.19)                | 0.81 (-0.08-1.70)  | 0.80 (-0.15-1.75) <sup>#</sup> |
| Minor allele               | 0.83 (-0.11-1.77)               | -0.17 (-1.05-0.72) | 1.15 (0.19-2.12) <sup>#</sup>  |
| <b>A2AP Arg6Trp</b>        |                                 |                    |                                |
| Wild-type                  | 1.27 (0.25-2.29)                | 0.70 (-0.11-1.52)  | 0.38 (-0.57-1.34) <sup>§</sup> |
| Minor allele               | 1.63 (0.46-2.80)                | 0.30 (-0.84-1.44)  | 1.32 (0.21-2.43) <sup>§</sup>  |

Linear regression analyses were performed using syndesmophytes at baseline, current smoking and CRP<sub>mean</sub> ≥10 mg/L as covariables. All analyses were adjusted for sex and for presence of definite radiographic sacroiliitis according to modified New York criteria. Analyses were performed on the total cohort as well as in genotype-defined subgroups as indicated.

\* p for homogeneity: 0.090.

<sup>§</sup> p for homogeneity: 0.39.

<sup>#</sup> p for homogeneity: 0.85.

<sup>§</sup> p for homogeneity: 0.13.

95% CI, 95% confidence interval; A2AP,  $\alpha_2$ -antiplasmin; CRP<sub>mean</sub>, time-average level of C-reactive protein; F13A, factor XIII A-subunit; F13B, factor XIII B-subunit; FGB,  $\beta$ -fibrinogen; mSASSS, modified Stoke Ankylosing Spondylitis Spinal Score
