# Supplementary material for: Predictive value of C-reactive protein for radiographic spinal progression in axial spondyloarthritis in dependence on genetic determinants of fibrin clot formation and fibrinolysis
Source: HighWire-hosted journal article supplement (doi:10.1136/rmdopen-2021-001751), 2021-06-01
Supplement: rmdopen-2021-001751supp003_data_supplement.pdf [file rmdopen-2021-001751supp003_data_supplement.pdf]

**Supplementary table S3.** Analyses on the association of fibrinogen, factor XIII and  $\alpha_2$ -antiplasmin genotypes with CRP and radiographic spinal progression (mSASSS change  $\geq 2$  points after 2 years) in axial spondyloarthritis.

| Genotype                 | CRP <sub>mean</sub> | CRP <sub>mean</sub> | CRP <sub>baseline</sub> | mSASSS              |
|--------------------------|---------------------|---------------------|-------------------------|---------------------|
|                          | >6 mg/L             | $\geq 10$ mg/L      | $\geq 10$ mg/L          | $\geq 2$ points     |
|                          | OR (95% CI)         | OR (95% CI)         | OR (95% CI)             | OR (95% CI)         |
| FGA Thr312Ala rs6050     | 0.64<br>(0.35-1.17) | 0.76<br>(0.38-1.48) | 0.57<br>(0.30-1.09)     | 0.47<br>(0.18-1.16) |
| FGA rs2070006 G>A        | 0.70<br>(0.37-1.33) | 1.28<br>(0.62-2.74) | 0.80<br>(0.41-1.58)     | 0.89<br>(0.37-2.27) |
| FGA rs2070016 T>C        | 0.98<br>(0.50-1.88) | 0.80<br>(0.37-1.68) | 0.87<br>(0.43-1.74)     | 0.89<br>(0.32-2.24) |
| FGB rs1800788 C>T        | 0.68<br>(0.36-1.28) | 0.78<br>(0.38-1.58) | 0.65<br>(0.32-1.26)     | 0.52<br>(0.18-1.35) |
| FGB rs1800790 G>A        | 0.90<br>(0.48-1.65) | 0.83<br>(0.42-1.64) | 0.86<br>(0.45-1.62)     | 0.83<br>(0.34-1.97) |
| FGG rs1049636 T>C        | 1.15<br>(0.63-2.10) | 1.27<br>(0.65-2.47) | 1.25<br>(0.66-2.33)     | 1.78<br>(0.76-4.20) |
| F13A Val34Leu rs5985     | 0.92<br>(0.50-1.68) | 0.62<br>(0.31-1.23) | 0.58<br>(0.30-1.11)     | 0.84<br>(0.35-1.96) |
| F13A Tyr204Phe rs3024477 | 2.74<br>(0.51-18.1) | 2.94<br>(0.52-16.3) | 2.19<br>(0.39-12.1)     | 0.85<br>(0.02-7.01) |
| F13B His95Arg rs6003     | 0.83<br>(0.43-1.58) | 1.04<br>(0.51-2.10) | 0.86<br>(0.43-1.68)     | 1.27<br>(0.51-3.03) |
| A2AP Arg6Trp rs2070863   | 1.38<br>(0.76-2.51) | 1.42<br>(0.73-2.76) | 1.33<br>(0.71-2.48)     | 1.51<br>(0.65-3.57) |

Chi<sup>2</sup>-testings for minor allele carriage as indicated.

95% CI, 95% confidence interval; A2AP,  $\alpha_2$ -antiplasmin; CRP<sub>baseline</sub>, level of C-reactive protein at baseline; CRP<sub>mean</sub>, time-averaged level of C-reactive protein; FGA,  $\alpha$ -fibrinogen; FGB,  $\beta$ -fibrinogen; FGG,  $\gamma$ -fibrinogen; F13A, factor XIII A-subunit; F13B, factor XIII B-subunit; mSASSS, modified Stoke Ankylosing Spondylitis Spinal Score; OR, odds ratio.
